# Supplementary material for: Metagenomic Analysis of Marigold: Mixed Infection Including Two New Viruses
Source: MDPI journal article supplement (doi:10.3390/v13071254), 2021-06-27
Supplement: s1 [file s1]

Table S1 Primers used in this study

| Virus                                           | Forward primer                                  | Reverse primer                                 |
|-------------------------------------------------|-------------------------------------------------|------------------------------------------------|
| Primer pair used for virus identification       |                                                 |                                                |
| <b>BBWV 2</b>                                   | ACCCGTACGC AACAGTTATG GCAGG                     | GAT CTTTCTGAAT TGTCTCGGTT TGG                  |
| <b>TuMV</b>                                     | CGTTTT CAAAGCAACC AACAACAACG                    | AACTCAATGT TCGACTCTT CGCCTT                    |
| <b>CMV</b>                                      | GCCATCAAGA AGATGGCTAC TGAGTGT                   | GTTACAATC ACACGGGACT CTAGACT                   |
| <b>MMV</b>                                      | GATT GTGGAGAAGT CGCCGGTATT GT                   | TCACGCACCA TCTTCGTAAA CTCTT                    |
| <b>MCV</b>                                      | GGACGACAGTCCGAAACTATCTATGAAG                    | CTCTGATGGA TCATAATACC TGTCATAGT                |
| Primer pair used for complete genome sequencing |                                                 |                                                |
| TuMV1                                           | CATACACAAAACGATTAAAGCAAACAC                     | TTTGCTTCAG CAGCTATTGT GACTAG                   |
| TuMV2                                           | TAGTCGTAAA GTTTCAAGTA GTGTTTG                   | TTAGGTACTT CACTTAAGTC CATAGGCT                 |
| TuMV3                                           | ACCACACATA CCACTAAAGG TATGTG                    | TGTCCCTTGC ATCCTATCAA ATGTTAAG                 |
| BBWV-2 RNA1-1                                   | TATTAACAA AACAGCTTTC GTTCCG                     | TCTCTGAATT ATCTCGATTA GGAATATC                 |
| BBWV-2 RNA1-2                                   | CACTCCAATC TTTATGGTGTATGTCAG                    | ACTTGGGAAA AGGCATTTC ACCCTG                    |
| BBWV-2 RNA2                                     | ATTGAAACAA ACAGCTTTCG TTCCGAG                   | CTAAAGCATA TTTATGTAGG AAGCTTT                  |
| MMV1                                            | AGTTGACCGT TATAATTTGA AGCATGG                   | GCCTCCCATATCTGCTGTACTTTCTG                     |
| MMV2                                            | AGAGTTAACTTGTTGGAAAAATTATCTG                    | TTCTGGAAAT CCTGCAATTG ATGCTG                   |
| MMV3                                            | GATATCAACA TAGTTCAAGA ACACTTC                   | CATAGTGTGC AAATTTTGAT TAACAT                   |
| MCV dsRNA1                                      | TACGGAAGAC TTACATTATG TCAGTCT                   | GAAG CAACTCCATA AATCCTTTTA AGCCT               |
| MCV dsRNA2                                      | TACACTAATG GCAGAGAAAC GTCCG                     | ATCAAAGTCG ATTACAAAAT TGTTGAAAC                |
| CMV RNA1                                        | AGAGCGTACG GTTCAACCCC TGCCT                     | GTCGAGTATG GTCTCCTTAT GGAGAAC                  |
| CMV RNA2                                        | CTCAAGAGCG TATGGTTCAA CCCCTG                    | GTCGAGTATG GTCTCCTTAT GGAGAAC                  |
| CMVRNA3                                         | ACCACTTTCTTTTCACGTCG TGTCGCGT                   | GTCGAGTATGGTCTCCTTAT GGAGAACCTG                |
| Primer for RACE                                 |                                                 |                                                |
|                                                 | 5'RACE                                          | 3'RACE                                         |
| <b>MMV</b>                                      | GATTACGCCAAGCTTCTGCTTTCT TCGTGACGAA CTCGAACTGC  | GATTACGCCAAGCTT GACGCCAGCA CGAGCTAAAG AGGCGC   |
| <b>MCV dsRNA1</b>                               | GATTACGCCAAGCTT CTTAC AGCTTCGACG CTCTGTCGCC     | GATTACGCCAAGCTT CTGAGT ACCCGTTGA AGACGGAAGT    |
| <b>MCV dsRNA2</b>                               | GATTACGCCAAGCTT TGC CGGTGGGGAG AGGGAACCTC TCG   | GATTACGCCAAGCTT GATGATGC TGAATCGTCC GAAGCTCCAG |
| <b>BBWV RNA1</b>                                | GATTACGCCAAGCTT CT CCTCTTTTC CTCCATAAT TCACAGG  | GATTACGCCAAGCTT CTCTGAATC GAGCATCCTT TCCTTATG  |
| <b>BBWV RNA2</b>                                | GATTACGCCAAGCTTGAAGGGCGCAACAA TATATGCAAA TTCGAG | GATTACGCCAAGCTT GGCTCT AACGTCGAAT TTGCTGGCC    |
